# Supplementary material for: Precision Medicine into Clinical Practice: A Web-Based Tool Enables Real-Time Pharmacogenetic Assessment of Tailored Treatments in Psychiatric Disorders
Source: MDPI journal article supplement (doi:10.3390/jpm11090851), 2021-08-27
Supplement: s1 [file s1]

**Figure S1.** Elaboration images. Five of the 6 panels of software page show loading image for elaboration time (5-10 minutes)

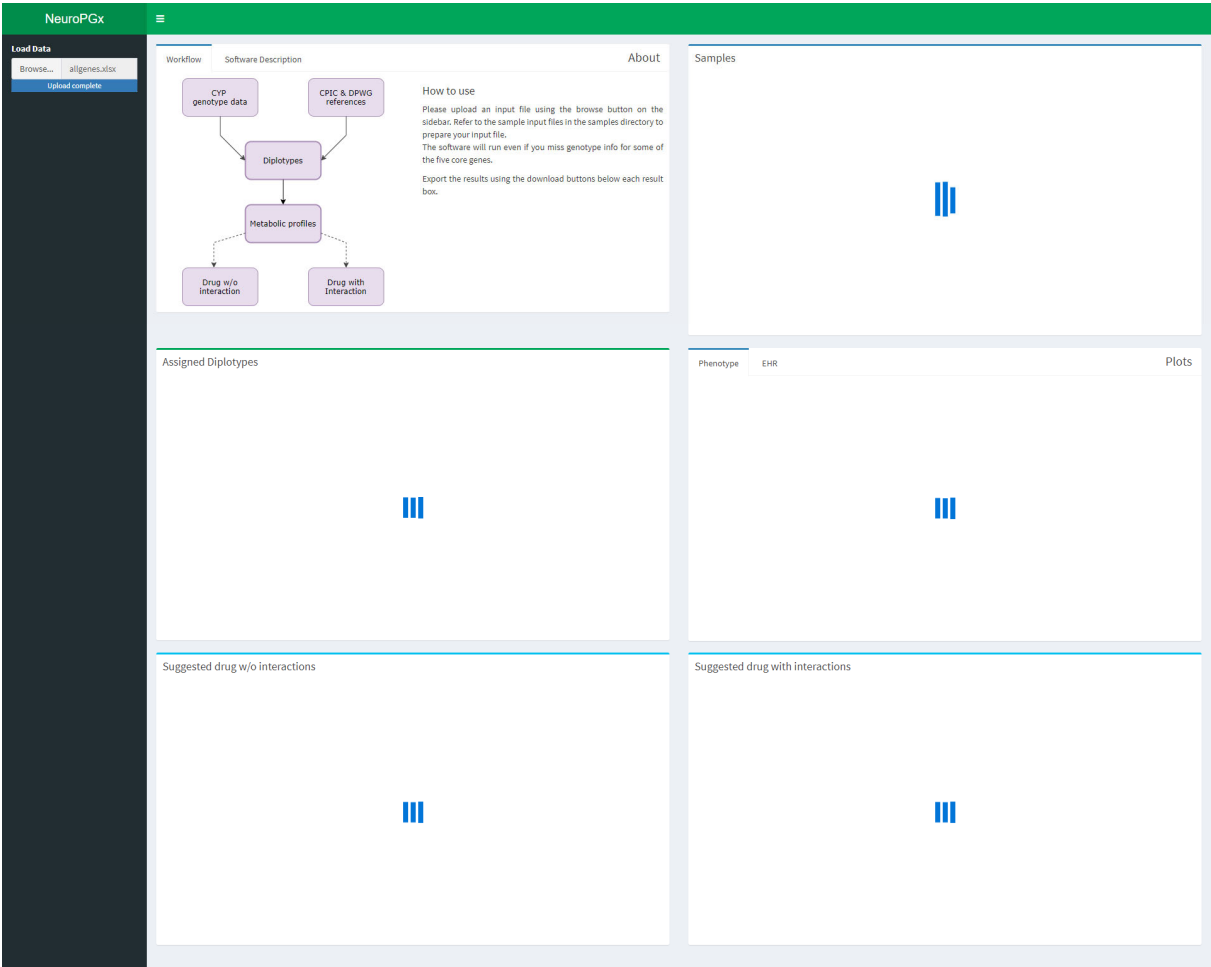

**Figure S2.** Full report. Overview of the 6 panels after elaboration time. The panels show: (A) details about how the software works, (B) overview of uploaded samples and genotypes, (C) overview of assigned diplotypes, (D) rapid overview of metabolization profile, (E) guideline suggestions for sample metabolization profile (single-gene), (F) guideline suggestions for sample metabolization profile (gene-gene interactions).

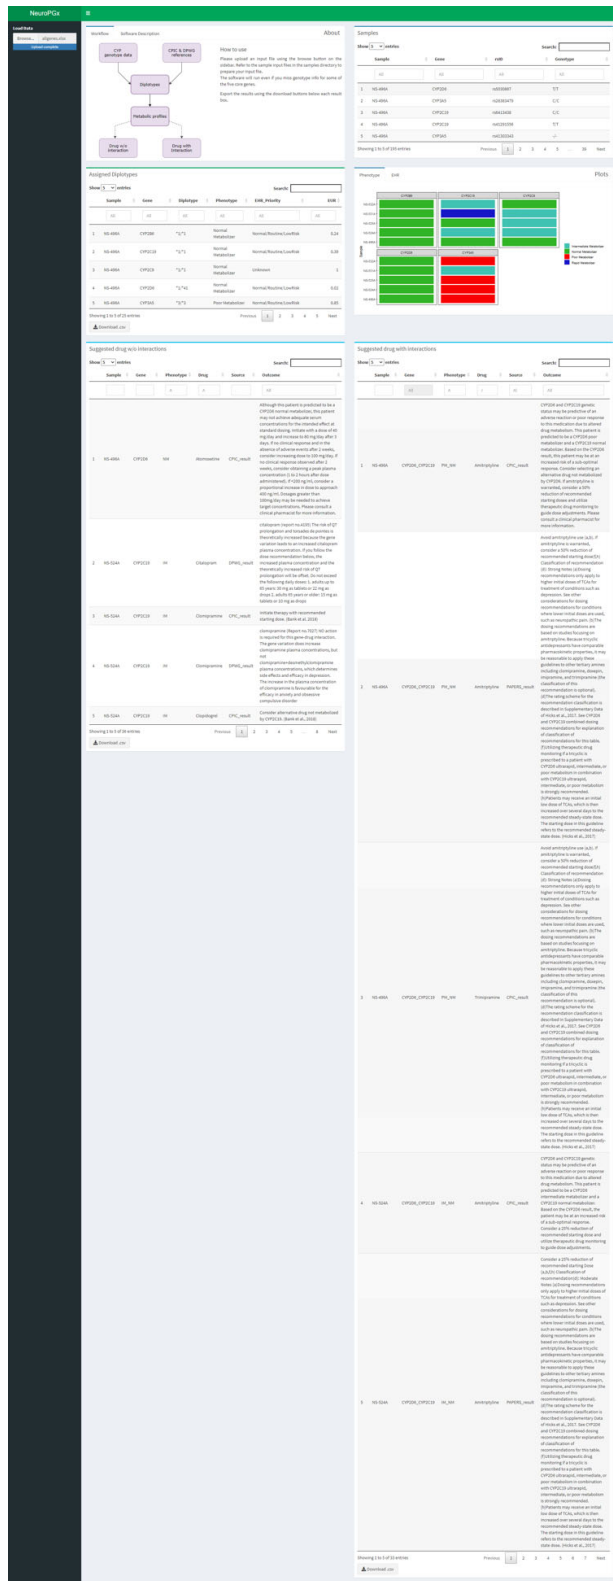

**Table S1.** List of genotypes recognized by the NeuroPgX software.

|         |            |         |            |               |     |     |     |
|---------|------------|---------|------------|---------------|-----|-----|-----|
| CYP2B6  | rs34223104 | T/T     | T/C        | C/C           |     |     |     |
| CYP2B6  | rs28399499 | T/T     | T/C        | C/C           |     |     |     |
| CYP2B6  | rs3211371  | C/C     | T/C        | C/C           |     |     |     |
| CYP2C19 | rs6413438  | C/C     | T/C        | T/T           |     |     |     |
| CYP2C19 | rs41291556 | T/T     | T/C        | C/C           |     |     |     |
| CYP2C19 | rs17884712 | G/G     | A/G        | A/A           |     |     |     |
| CYP2C19 | rs72558186 | T/T     | A/T        | A/A           |     |     |     |
| CYP2C19 | rs12248560 | C/C     | T/C        | T/T           |     |     |     |
| CYP2C19 | rs28399504 | A/A     | A/G        | G/G           |     |     |     |
| CYP2C19 | rs72552267 | G/G     | A/G        | A/A           |     |     |     |
| CYP2C19 | rs4986893  | G/G     | A/G        | A/A           |     |     |     |
| CYP2C19 | rs4244285  | G/G     | A/G        | A/A           |     |     |     |
| CYP2C19 | rs56337013 | C/C     | T/C        | T/T           |     |     |     |
| CYP2C9  | rs28371686 | C/C     | C/G        | G/G           |     |     |     |
| CYP2C9  | rs9332131  | A/A     | A/delA     | delA/delA     |     |     |     |
| CYP2C9  | rs1057910  | A/A     | A/C        | C/C           |     |     |     |
| CYP2C9  | rs28371685 | C/C     | C/T        | T/T           |     |     |     |
| CYP2C9  | rs56165452 | T/T     | C/T        | C/C           |     |     |     |
| CYP2C9  | rs1799853  | C/C     | C/T        | T/T           |     |     |     |
| CYP2D6  | rs5030867  | T/T     | T/G        | G/G           |     |     |     |
| CYP2D6  | rs59421388 | C/C     | C/T        | T/T           |     |     |     |
| CYP2D6  | rs28371725 | C/C     | C/T        | T/T           |     |     |     |
| CYP2D6  | rs1065852  | G/G     | A/G        | A/A           |     |     |     |
| CYP2D6  | rs5030655  | A/A     | A/delA     | delA/delA     |     |     |     |
| CYP2D6  | rs5030865  | C/C     | C/A        | A/A           | A/T | T/T | C/T |
| CYP2D6  | rs16947    | G/G     | A/G        | A/A           |     |     |     |
| CYP2D6  | rs5030656  | CTT/CTT | CTT/delCTT | delCTT/delCTT |     |     |     |
| CYP2D6  | rs3892097  | C/C     | C/T        | T/T           |     |     |     |
| CYP2D6  | rs28371706 | G/G     | A/G        | A/A           |     |     |     |
| CYP2D6  | rs35742686 | T/T     | T/delT     | delT/delT     |     |     |     |
| CYP2D6  | rs5030862  | C/C     | C/T        | T/T           |     |     |     |
| CYP2D6  | rs1135840  | C/C     | C/G        | G/G           |     |     |     |
| CYP3A5  | rs28383479 | C/C     | C/T        | T/T           |     |     |     |
| CYP3A5  | rs41303343 | -/-     | insA/-     | insA/insA     |     |     |     |
| CYP3A5  | rs776746   | C/C     | C/T        | T/T           |     |     |     |
| CYP3A5  | rs55817950 | G/G     | A/G        | A/A           |     |     |     |
| CYP3A5  | rs28365083 | G/G     | G/T        | T/T           |     |     |     |
| CYP3A5  | rs10264272 | C/C     | C/T        | T/T           |     |     |     |
